## Mitochondrial membrane tension governs fission

Dora Mahecic<sup>1,2\*</sup>, Lina Carlini<sup>1,2\*</sup>, Tatjana Kleele<sup>1,2</sup>, Adai Colom<sup>2,3,□</sup>, Antoine Goujon<sup>2,4</sup>,  
Stefan Matile<sup>2,4</sup>, Aurélien Roux<sup>2,3</sup>, and Suliana Manley<sup>1,2</sup>

<sup>1</sup> Institute of Physics, École Polytechnique Fédérale de Lausanne (EPFL), Route Cantonale,  
1015 Lausanne, Switzerland

<sup>2</sup> National Centre for Competence in Research Programme Chemical Biology, Switzerland

<sup>3</sup> Department of Biochemistry, University of Geneva, CH-1211 Geneva, Switzerland

<sup>4</sup> Department of Organic Chemistry, University of Geneva, CH-1211 Geneva, Switzerland

\* These authors contributed equally to this work

□ Current address: Biofisika Institute (CSIC, UPV/EHU) and Department of Biochemistry and  
Molecular Biology, University of the Basque Country, Leioa, Spain

Correspondence should be addressed to

S.M. (email: [suliana.manley@epfl.ch](mailto:suliana.manley@epfl.ch))

## 1 **Abstract**

2 During mitochondrial fission, key molecular and cellular factors assemble on the outer  
3 mitochondrial membrane, where they coordinate to generate constriction. Constriction sites  
4 can eventually divide, or reverse upon disassembly of the machinery. However, a role for  
5 membrane tension in mitochondrial fission, although speculated, has remained undefined. We  
6 captured the dynamics of constricting mitochondria in mammalian cells using live-cell  
7 structured illumination microscopy (SIM). By analyzing the diameters of tubules that emerge  
8 from mitochondria and implementing a fluorescence lifetime-based mitochondrial membrane  
9 tension sensor, we discovered that mitochondria are indeed under tension. Under  
10 perturbations that reduce mitochondrial tension, constrictions initiate at the same rate, but are  
11 less likely to divide. We propose a model based on our estimates of mitochondrial membrane  
12 tension and bending energy in living cells which accounts for the observed probability  
13 distribution for mitochondrial constrictions to divide.

14 **Keywords:** mitochondrial dynamics, mitochondrial division, membrane tension

15

## 16 **Introduction**

17 Mitochondria are highly dynamic organelles, transported through the cytoplasm along  
18 cytoskeletal networks while they change in size and shape (Nunnari et al., 1997; Youle and  
19 van der Bliek, 2012). Mitochondrial dynamics and network connectivity have been linked to  
20 bioenergetic function, allowing adaptation of cellular energy production in response to stress  
21 (Gomes et al., 2011; Rambold et al., 2011; Tondera et al., 2009) and regulation of the cell  
22 cycle (Mitra et al., 2009). Unique among organelles, mitochondria cannot be generated de  
23 novo, but instead must proliferate by fission, also referred to as division (Youle and van der

24 Blik, 2012). Thus, fission plays an important role in ensuring cellular inheritance of  
25 mitochondria, as well as being implicated in quality control by acting as a step in the  
26 mitophagic pathway (Burman et al., 2017; Twig et al., 2008).

27 In mammalian cells, the known mitochondrial fission machinery assembles on the  
28 outer surface of the organelle. Initially, the fission site is marked by a pre-constriction defined  
29 by contact with ER tubules (Friedman et al., 2011) and deformed by targeted actin  
30 polymerization (Ji et al., 2015; Korobova et al., 2013; Manor et al., 2015). Subsequently,  
31 surface receptors including MiD49/51 (Palmer et al., 2011), Mff (Gandre-Babbe and van der  
32 Blik, 2008; Otera et al., 2010) or Fis1 (Mozdy et al., 2000) accumulate at the pre-  
33 constriction and recruit dynamin related protein (Drp1) (Labrousse et al., 1999; Smirnova et  
34 al., 2001). Drp1 oligomerizes into helices that wrap around the division site, and hydrolyzes  
35 GTP to provide a mechano-chemical force for constriction (Fröhlich et al., 2013; Ingeman et  
36 al., 2005; Mears et al., 2011; Kalia et al., 2018). In addition, the dynamin 2 protein (Dyn2) can  
37 play a role in fission downstream of Drp1 (Lee et al., 2016), albeit a non-essential one  
38 (Fonseca et al., 2019; Kamerkar et al., 2018). Interestingly, deformations induced by  
39 exogenous mechanical forces can also trigger recruitment of the downstream machinery for  
40 mitochondrial fission (Helle et al., 2017). This underlines that membrane fission processes  
41 are fundamentally mechanical in nature, triggered by forces that generate membrane  
42 deformation.

43 An additional factor, membrane tension, is known to play a crucial role in other  
44 processes involving membrane deformations such as exocytosis (Gauthier et al., 2011),  
45 endocytosis (Morlot et al., 2012; Riggi et al., 2019; Roux et al., 2006), cytokinesis (Lafaurie-  
46 Janvire et al., 2013), and cell protrusion (Raucher and Sheetz, 2000). Tension in the plasma  
47 membrane is a consequence of built-in bilayer tension and stresses from the cytoskeleton and  
48 its motors (Keren et al., 2008; Kozlov and Mogilner, 2007), which can together impact the

49 ability of an applied force to drive membrane fission. Indeed, in budding yeast, membrane  
50 tethers anchoring mitochondria to the cell cortex were shown to play a role in mitochondrial  
51 fission, which was hypothesized to be linked to tension (Klecker et al., 2013). However, the  
52 role and origins of membrane tension remain little explored in the context of mitochondrial  
53 fission in mammalian cells. This is in part because it is challenging to quantify the tension,  
54 even in relative terms, of mitochondria in living cells.

55 Here, we report a key role for membrane tension in governing mitochondrial division  
56 in mammalian cells. Using time-lapse super-resolution imaging, we measured dynamic  
57 changes in membrane shape to identify highly constricted sites with diameters below 200 nm.  
58 We observed that the presence of the fission machinery, while necessary, is not sufficient to  
59 ensure division. We found that constrictions were more likely to result in division when  
60 mitochondria were under higher membrane tension. A novel Fluorescence Lifetime Imaging  
61 (FLIM) mitochondrial membrane tension sensor (Goujon et al., 2019) revealed that  
62 mitochondrial membrane tension was reduced following depolymerization of the microtubule  
63 network, a condition that resulted in the same frequency of constriction initiation, but a lower  
64 frequency of fissions. Finally, based on our measurements in living cells, we propose a  
65 physical model for mitochondrial division in which membrane tension combines with elastic  
66 energy during constriction to govern the kinetics and probability of fission.

67

## 68 **Results**

### 69 ***Constriction by the division machinery does not ensure fission***

70 We performed live-cell SIM imaging of COS-7 cells transiently transfected with  
71 Drp1-mCherry and GFP targeted to the matrix by the mitochondrial targeting sequence from  
72 subunit VIII of human cytochrome c oxidase (mito-GFP). We observed that some

73 constrictions marked by Drp1-mCherry proceeded to fission (Figure 1A, S1, Movie S1), but  
 74 others lost enrichment of Drp1 without dividing and relaxed to an unconstricted state (termed  
 75 ‘reversal’) (Figure. 1B, S1, Movie S2). Similar “reversible” or “non-productive” Drp1  
 76 constrictions were previously reported in yeast (Legesse-Miller et al., 2003) and mammalian  
 77 cells (Ji et al., 2015), although their physical properties remained unquantified and their cause  
 78 was unclear. For quantification purposes, we defined ‘reversals’ as Drp1-enriched  
 79 constriction sites that reached a diameter below 200 nm before relaxing, well below the mean  
 80 mitochondrial diameter of ~500 nm (Figure 1C,D, S1).

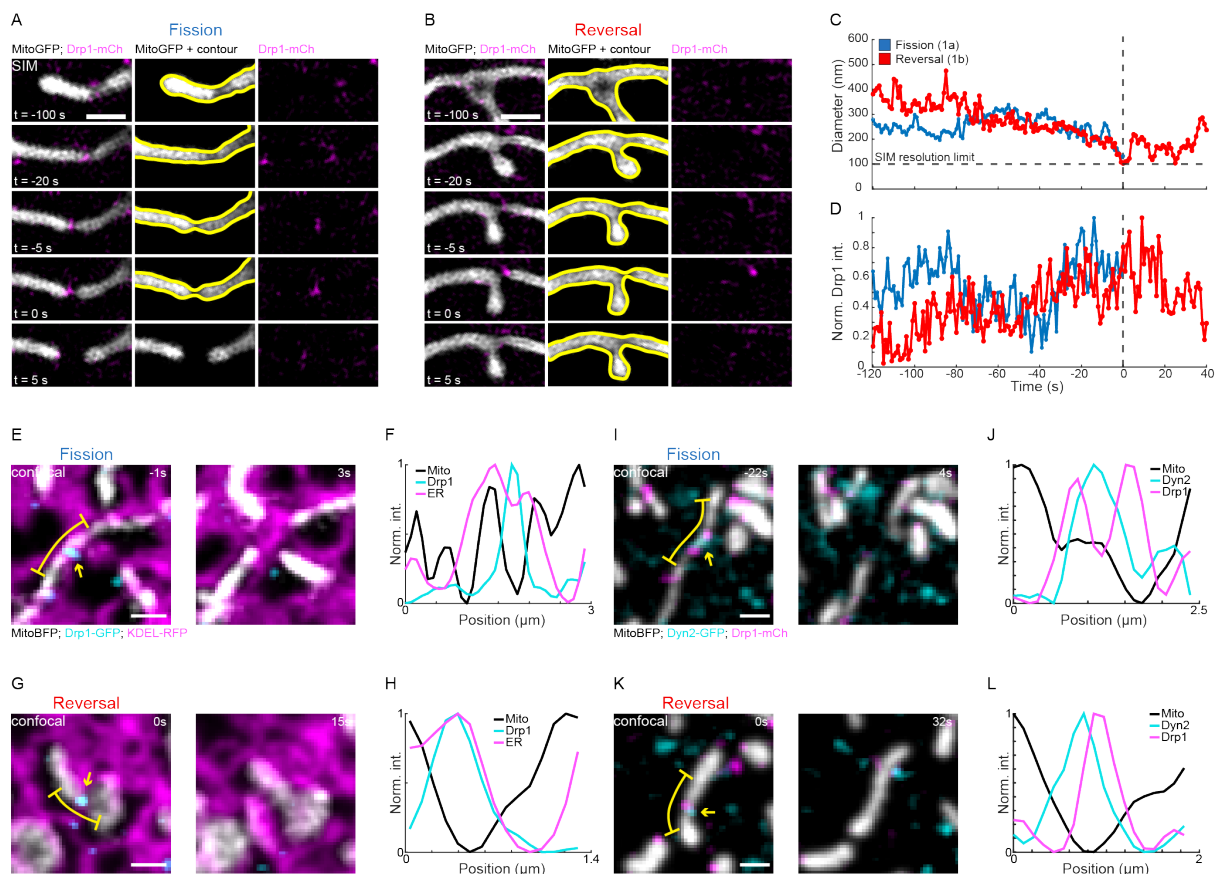

81  
 82 **Figure 1: Key molecular components are present at constriction sites that undergo**  
 83 **reversals.** (A, B) Time-lapse SIM imaging of COS-7 cells transiently transfected with mito-  
 84 GFP (greyscale) and mCherry-Drp1 (magenta) showing an example (A) fission and (B)  
 85 reversal (see Movies S1,2, SFig 1). (C) Time evolution of diameter at the mitochondrial  
 86 constriction site measured for fission (blue) and reversal (red) events shown in A, B. (D)

87 Integrated intensity of Drp1 at the constriction site over time measured for fission (blue) and  
88 reversal (red) events shown in A, B, normalized to the maximum value. (E, G) Time-lapse  
89 live-cell confocal imaging of Mito-BFP, Drp1-GFP and KDEL-RFP showing examples of  
90 fission and reversal. (F, H) Intensity profiles of ER, Mito and Drp1 intensities adjacent to the  
91 yellow dashed lines in E,G. (I, K) Time-lapse SIM imaging of mitochondria and Dyn2  
92 showing a reversal at a Dyn2-enriched constriction site. (J, L) Intensity profiles of ER, Mito  
93 and Drp1 intensities adjacent to the yellow dashed lines in I, K. Scale bar represents 500 nm  
94 in A and B. Scale bar represents 1  $\mu\text{m}$  in E, G, I, K, and yellow arrows mark the constriction  
95 site.

96 To examine whether reversals result from differences in fission machinery, we  
97 imaged several fission factors – the ER, Drp1 and Dyn2, restricting our analysis to Drp1-  
98 mediated constrictions. Since our SIM imaging was limited to two colors, we performed fast  
99 (1 Hz), three-color live-cell confocal imaging of mitochondria and Drp1, with either Dyn2 or  
100 the ER (Figure 1E-L). We found that Dyn2 could be present or absent at Drp1-mediated  
101 constrictions (Figure 1I-L), with 30% of fissions and 36% of reversals enriched in Dyn2  
102 (N=30 and 33 respectively) (Figure 1I-L). These observations are consistent with recent  
103 reports that Drp1, but not Dyn2 is essential for mitochondrial division (Kamerkar et al.,  
104 2018). We further measured colocalization between Drp1 mediated mitochondrial  
105 constrictions and ER tubules, as such contacts were shown to mark sites prior to division  
106 (Friedman et al., 2011). We found that both fissions and reversals could occur at constrictions  
107 overlapping with ER tubules (90% for fissions (N=10) and 89% for reversals (N=18), Figure  
108 1E,G), which appear as peaks in intensity profiles along the constriction site (Figure 1F,H).

109 An accumulation of Drp1 at these sites typically coincided with an increased rate of  
110 constriction, measured at  $\sim 17$  nm/s for fissions and 18 nm/s for reversals during the 5 seconds  
111 leading up to maximal constriction, suggesting active constriction by Drp1 (Figure S2, N=61

112 for fissions and N=38 for reversals). Some sites underwent several cycles of constriction and  
113 relaxation, coupled with Drp1 accumulation and disassembly (Figure 1D). Cyclic dynamics  
114 could lead to either fission or reversal,  $3\pm 2$  constriction cycles/min (N=61) and  $2\pm 1$   
115 cycles/min respectively (N=38), implying that neither abundance of Drp1, nor constriction  
116 rate, nor cyclic activity distinguishes fissions from reversals. Overall, 66% of constriction  
117 sites underwent fission (N=112, Figure S1), while the remaining 34% ended as reversals  
118 (N=57, Figure S1). Thus, differences in observed constriction dynamics or machinery do not  
119 account for differences in success to divide.

120

### 121 ***Fission events are characterized by increased membrane tension***

122 The division machinery wraps around mitochondria, providing a force that locally  
123 constricts the organelle. However, in other examples of membrane fission, an interplay  
124 between force and membrane tension determines whether fission is driven to completion  
125 (Gauthier et al., 2011; Lafaurie-Janvore et al., 2013; Morlot et al., 2012; Raucher and Sheetz,  
126 2000; Riggi et al., 2019; Sinha et al., 2011). We noticed that after division, daughter  
127 mitochondria would recoil away from the division site (Figure 2A), reminiscent of an elastic  
128 body being cut under tension (Movie S4, S5). Therefore, we decided to examine the  
129 relationship between membrane tension and the probability of fission versus reversal.

130 In vitro experiments can estimate membrane tension by pulling on a membrane and  
131 measuring the size of the resulting membrane tubule (Derényi et al., 2002; Evans and Yeung,  
132 1994). Analogously, microtubule motors in living cells can spontaneously extrude  
133 mitochondrial membrane nanotubes (Huang et al., 2013; Wang et al., 2015) (Figure 2B). We  
134 observed nanotubes just before fissions or reversals, at similar frequencies (19% and 24% for  
135 N=101 and 59 respectively). We inferred the membrane tension by classical energy  
136 minimization, which gives a relationship between the nanotube diameter  $d$ , membrane

137 tension  $\tau$ , and membrane bending rigidity  $\kappa_B$  (Derényi et al., 2002; Evans and Yeung, 1994)  
138 (Figure 2C, SI):

139 
$$\tau = \frac{2\kappa_B}{d^2} \quad (1)$$

140 The average diameters of tubules pulled from mitochondria that subsequently either  
141 divided or reversed were  $176 \pm 4$  nm and  $229 \pm 7$  nm respectively (Figure 2D). Thus, the  
142 population of mitochondria undergoing fission was on average under significantly higher  
143 membrane tension at  $5.81 \pm 0.54 \times 10^{-6}$  N/m, compared to the population undergoing  
144 reversals at  $3.85 \pm 0.75 \times 10^{-6}$  N/m (Figure 4e, N = 19 and N = 14 respectively, mean  $\pm$   
145 SEM). We found consistent values when analyzing the recoil motion of mitochondria post-  
146 fission to independently estimate membrane tension (SI, Figure S3). Together, these data  
147 show that mitochondrial constrictions which are under higher tension are more likely to  
148 undergo fission.

149 Additionally, membrane tubes under tension can spontaneously develop undulations  
150 through a “pearling instability”. We observed undulations on 11% of dividing mitochondria  
151 (N=88) (Figure S3), also previously reported during mitochondrial fragmentation (Gonzalez-  
152 Rodriguez et al., 2015) and in neuronal mitochondria (Cho et al., 2017). We found that  
153 constricted mitochondria exhibiting pearling modes eventually underwent fission of at least  
154 one of the constriction sites (100%, N=10). Conversely, reversals of pearling modes were  
155 rarely observed (4%, N=57) and occurred exclusively following fission at a neighboring  
156 constriction site, suggesting that the loss of tension released during fission could be  
157 responsible (Figure S3, Movie S4, S5).



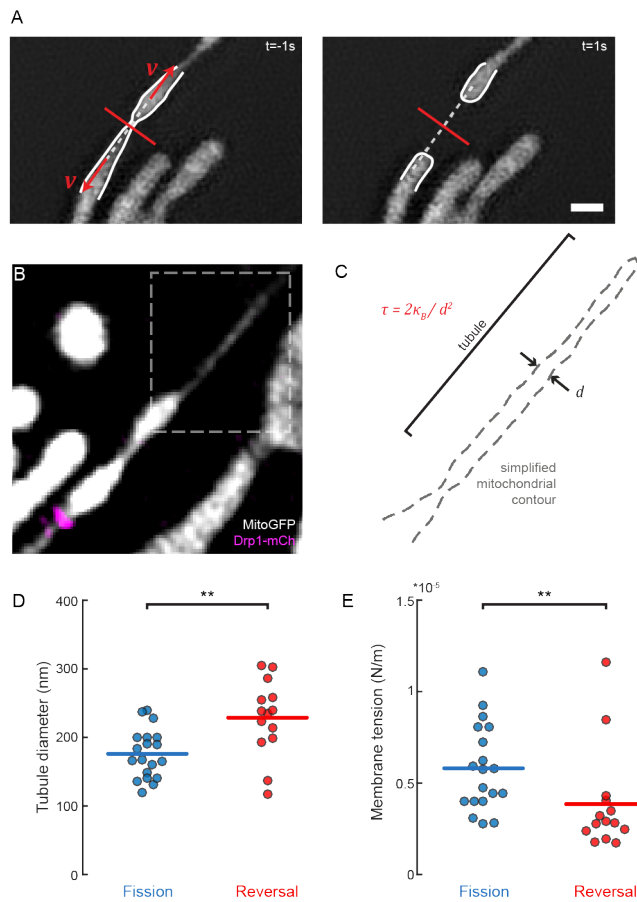

158

159 **Figure 2: Estimated membrane tension for fissions and reversals.** (A) Time-lapse SIM  
 160 images of a mitochondrion (mito-GFP) 1 sec before (left) and after (right) fission showing the  
 161 recoil of daughter mitochondria post fission. Measured retraction velocities  $v$  (red arrows)  
 162 were projected perpendicular to the constriction site (white dashed line). (B) Fluorescence  
 163 image showing a constricted mitochondrion with a pulled membrane tube (boxed region).  
 164 Scale bar: 1  $\mu\text{m}$ . (C) Mitochondrial contour from the outlined region in (A) showing the  
 165 diameter of the tube  $d$ , used as a readout for tension  $\tau$ . (D) Distribution of tubule radii  
 166 measured between fission and reversal events. (E) Distribution of calculated membrane  
 167 tension values between fission and reversal events. Statistical significance calculated by 1-  
 168 and 2-tailed Mann-Whitney U test where appropriate: \*\* $P < 0.01$ .

169

170 **Reduced membrane tension results in increased probability of reversals**

171 We set out to understand the origin of membrane tension in dividing mitochondria.  
172 Post-division recoil suggests the presence of external forces pulling or anchoring  
173 mitochondria. Mitochondrial transport is mainly mediated through microtubule motors  
174 (Boldogh and Pon, 2007), and we hypothesized that they could generate membrane tension.  
175 To test this hypothesis, we depolymerized microtubules using nocodazole (De Brabander et  
176 al., 1976; Hoebeke et al., 1976). Indeed, during a timeframe of 1-hour post-treatment while  
177 cell and organelle morphologies were maintained (Figure S3), we observed a decrease in  
178 recoil velocities (Figure 3A) consistent with a reduction of estimated membrane tensions by  
179 40% (SI, N=33 control and N=26 nocodazole).

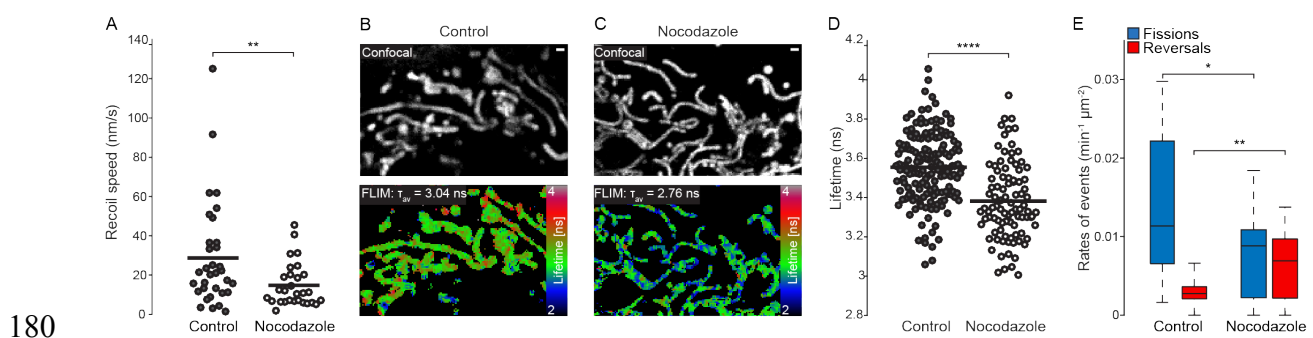

181 **Figure 3: Membrane tension under nocodazole perturbation.** (A) Distribution of recoil  
182 speeds of mitochondria post-division, between control and nocodazole treated cells. (B,C)  
183 Confocal (top) and FLIM (bottom) images of mitochondria in cells stained with the  
184 mitochondria-targeted FliptR fluorescent tension probe under (B) control conditions and (C)  
185 nocodazole treatment. (D) Distributions of bulk fluorescence lifetimes of the FliptR  
186 fluorescent tension probe between control and nocodazole-treated cells. (E) Box chart  
187 showing rates of fission and reversal in Nocodazole treated (N=16) and control (N=16) cells.  
188 Scale bars: 1µm. Statistical significance calculated by 1- and 2-tailed Mann-Whitney U test  
189 where appropriate: \*P<0.05, \*\*P<0.01, \*\*\*\*P<0.0001.

190

191 To more directly test whether depolymerizing microtubules decreases membrane  
192 tension, we used a mitochondrial-targeted variant of the mechanosensitive FliptR probe  
193 (Figure 3B,C, Figure S3) (Colom et al., 2018; Goujon et al., 2019; Soleimanpour et al.,  
194 2016). The fluorescence lifetime of FliptR depends on the orientation between its  
195 chromophoric groups, which is sensitive to membrane tension. Comparing control versus  
196 nocodazole-treated cells, FliptR showed significantly shorter average fluorescence lifetimes,  
197 indicative of an overall reduction in mitochondrial membrane tension (Figure 3D).

198 Having established that nocodazole treatment reduces mitochondrial membrane  
199 tension, we examined its consequences on mitochondrial division by quantifying the  
200 probability for constriction sites to divide or reverse. Importantly, the rate of Drp1-induced  
201 constrictions initiated per mitochondrial area was unperturbed by nocodazole treatment (~  
202  $0.014 \text{ min}^{-1} \mu\text{m}^{-2}$ ). Furthermore, the degree of overlap between mitochondria and ER  
203 remained unchanged (Figure S3), as did mitochondrial diameter and membrane potential  
204 (Figure S3), suggesting that the mitochondrial physiology and the ability of the division  
205 machinery to constrict were unaffected by nocodazole treatment. However, we found a 2.4-  
206 fold increase in the rate of reversal events, and a concomitant decrease in the rate of fission  
207 (Figure 3E). Thus, a reduced membrane tension did not change the initiation of Drp1-  
208 mediated constrictions, but reduced the efficiency of their fission significantly.

209

### 210 ***Tension modifies the energy landscape of mitochondrial fission***

211 The fission process can be represented as an energy landscape where during fission,  
212 the elastic energy stored in the mitochondrial membrane overcomes an energy barrier  $E_f$ .  
213 During constriction, the local elastic energy increases through tension and bending of the  
214 membrane. To account for membrane bending and its contribution to the elastic energy of the  
215 membrane, we estimated the membrane bending energy of mitochondrial constrictions from

216 their shape (Figure S4, SI) and by numerically evaluating the Helfrich equation (Helfrich,  
217 1973). Both fissions and reversals accumulated bending energy at the constriction, reaching  
218  $188 \pm 14$   $k_B T$  versus  $127 \pm 10$   $k_B T$  respectively at maximal constriction (mean  $\pm$  SEM, N=70 and  
219 43 respectively, Figure S4, Appendix A). Note that our ability to estimate the bending energy  
220 is limited by the resolution of the contour. We find that there is significant overlap between  
221 the distributions (Figure S4), and a range of values of constricted state bending energies can  
222 result in either outcome (Figure S4), underlining the probabilistic nature of this model.

223 To estimate the energy barrier to fission, we calculated the probability of fission  $p(E)$ ,  
224 defined experimentally as the ratio of the number of fissions to all constrictions with a given  
225 energy.  $p(E)$  increases with local bending energy, and by determining the bending energy at  
226 which all constrictions result in fission ( $p(E)=1$ ), we could estimate the energy barrier to  
227 fission as  $\sim 300$   $k_B T$ . Considering that mitochondria are double-membraned organelles, this  
228 estimate is consistent with simulations of dynamin-mediated scission (Morlot et al., 2012), as  
229 well as theoretical estimates for a hemifission state, which spontaneously leads to fission  
230 (Kozlovsky and Kozlov, 2003).

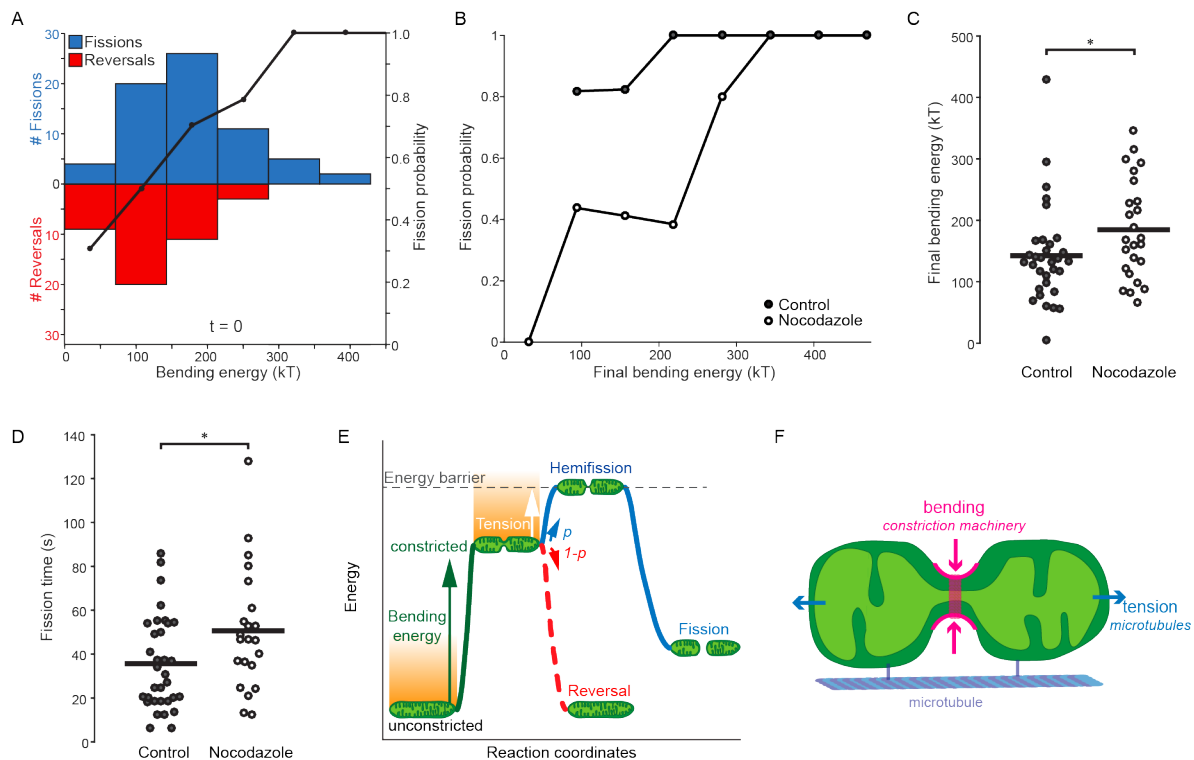

231

232 **Figure 4: Fission timing and probability related to bending energy and tension. (A) Left:**

233 Histogram showing numbers of fissions and reversals at different local bending energy

234 intervals. Right: Experimental probability of fission calculated as ratio of fissions to total

235 constrictions at different local bending energy intervals. (B) Experimental probability of

236 fission of control and nocodazole treated cells. (C) Distribution of final bending energies

237 between control and nocodazole treated fission events. (D) Distribution of fission times

238 between control and nocodazole treated fission events. (E) Cartoon of the probabilistic model

239 of mitochondrial fission showing the contribution of bending energy (green line) and

240 membrane tension (orange shaded area) in reaching the energy barrier for fission (grey

241 dashed line). Both bending energy and tension set the probability  $p$  of fission (blue line).

242 Reversals occur either due to a lack of bending energy or low probability of necessary

243 fluctuation energies. (F) Schematic representation of the different contributions to fission

244 probability: bending energy (magenta) and tension (blue). Statistical significance calculated

245 by 1- and 2-tailed Mann-Whitney U test where appropriate: \* $P < 0.05$ .

246

247 To test the effect of membrane tension on the energy landscape for fission, we  
248 compared the experimental probability of fission between control and nocodazole treated  
249 cells. We found it was shifted towards higher bending energies when membrane tension is  
250 reduced (Figure 4B). Therefore, achieving a similar probability of fission would now require  
251 more deformation to increase the energy of the constricted state (Figure 4C, N=33 control  
252 and 22 nocodazole). We also noticed that Drp1 appeared to reside for longer time periods at  
253 mitochondrial constriction sites in nocodazole-treated cells. Fission events in nocodazole-  
254 treated cells required on average  $\sim 12 \pm 7$  s longer (Figure 4D, N=33 control and N=22  
255 nocodazole), reflecting decreased fission probability and consistent with a major role for  
256 membrane tension in driving the final step of fission.

257

## 258 **Discussion**

259 We report that membrane tension plays a key role in governing mitochondrial fission.  
260 How might tension promote mitochondrial division? In a model proposed for dynamin-  
261 mediated endocytosis, thermal fluctuations of the membrane bring it over the energy barrier  
262 to fission (Morlot et al., 2012). One possibility is that tension fluctuations play an analogous  
263 role to thermal fluctuations to overcome the fission barrier. Microtubule-dependent motor  
264 proteins, which anchor and transport mitochondria along microtubules, were shown to  
265 generate piconewtons of force on millisecond timescales (Carter and Cross, 2005). This  
266 suggests that tension can be modulated several orders of magnitude faster than it takes a  
267 mitochondrion to divide.

268 In such a tension-driven model, when the division machinery induces constriction, it  
269 brings membranes closer to the energy barrier to fission (Figure 4E,F). Fluctuations in  
270 tension could then stochastically deform mitochondrial membranes, storing additional elastic

271 energy at the constriction site to overcome the energy barrier to fission. According to such a  
272 model, since constrictions cannot be maintained indefinitely, mitochondrial constriction sites  
273 that do not experience a large enough fluctuation during their lifetime will become reversals.  
274 This model is supported by our independent estimates of the energy contribution from tension  
275 and the magnitude of the mean fluctuation energy extracted from the experimental probability  
276 of fission, both of which are  $\sim 100$  k<sub>B</sub>T (SI). We note that this estimate indicates that thermal  
277 fluctuations are insufficient for mitochondrial fission. Furthermore, considering our  
278 observations in nocodazole treated cells, our model suggests that lower membrane tension  
279 results in lower fluctuation energy (SI), and thus increases the probability of reversal.

280 Overall, the proposed probabilistic nature of mitochondrial fission may play a role in  
281 regulating mitochondrial network morphologies. For instance, mitochondrial division has  
282 been observed to take place near replicating nucleoids (Lewis et al., 2016) – the presence of  
283 which might create ‘rigid islands’ that alter the mechanical properties at adjacent constriction  
284 sites (Feng and Kornmann, 2018), making them more likely to divide according to our model.  
285 Such internal mechanisms could simultaneously control the positioning and fate of  
286 mitochondrial constrictions. Furthermore, our work suggests how remodeling of the  
287 microtubule cytoskeleton could impact global mitochondrial morphology and proliferation  
288 through changes in mitochondrial membrane tension. Additional work is needed to examine  
289 the role of microtubules in establishing mitochondrial membrane tension and their regulation  
290 during mitochondrial fission.

291

## 292 **Acknowledgements**

293 We would like to thank H el ene Perreten for technical assistance, Dr. Hari Shroff for the  
294 mitoGFP construct and Dr. Gia Voeltz for the Drp1 and Dyn2 constructs. We would like to

295 thank Niklas Berliner, Jennifer Lippincott Schwartz, Simon Schutz and Dr. Tobias Schneider  
296 for helpful discussions. Imaging data used in this publication was produced in collaboration  
297 with the Advanced Imaging Center, a facility jointly supported by the Gordon and Betty  
298 Moore Foundation and HHMI at HHMI's Janelia Research Campus. We thank Lin Shao and  
299 Teng-Leong Chew at Janelia AIC for their help with SIM imaging. We thank Timo Rey,  
300 Sofia Zaganelli, Benoit Kornmann, Qian Feng, Thomas Misgeld and Leanne Godinho for  
301 comments on the manuscript. Research in S.M.'s and A.R.'s laboratories is supported by the  
302 National Centre of Competence in Research Chemical Biology. T.K. received funding from  
303 European Molecular Biology Organization (ALTF-739-2016) and the Munich Cluster for  
304 Systems Neurology (SyNergy).

305

#### 306 **Author contributions**

307 Conceptualization, D.M., L.C., T.K., A.R., S.M.; Methodology, D.M., L.C., T.K., A.R., S.M.;  
308 Software, D.M., L.C.; Validation, D.M., L.C., T.K.; Formal Analysis, D.M., L.C., A.C.;  
309 Investigation, D.M., L.C., T.K., A.C.; Resources, A.C., A.G., S.Mat., A.R.; Data Curation,  
310 D.M., L.C.; Writing – Original Draft, D.M., L.C., S.M.; Writing – Review and Editing, D.M.,  
311 L.C., T.K., A.C., A.G., S.Mat., A.R., S.M.; Visualization, D.M., L.C., T.K.; Supervision,  
312 A.R., S.M.; Project Administration S.M.; Funding Acquisition, T.K., S.M.

313

#### 314 **Declaration of interests**

315 The original FliptR probe (not targeted to mitochondria), is sold by Spirochrome through the  
316 NCCR website, from which the NCCR receives 15% of the profits.

317



318 **References**

- 319 Antonio Trujillo-Ortiz, 2015. DagoSptest - File Exchange - MATLAB Central [WWW  
320 Document]. URL <https://ch.mathworks.com/matlabcentral/fileexchange/3954-dagosptest>  
321 (accessed 12.12.17).
- 322 Boldogh, I.R., Pon, L.A., 2007. Mitochondria on the move. *Trends Cell Biol.*  
323 <https://doi.org/10.1016/j.tcb.2007.07.008>
- 324 Burman, J.L., Pickles, S., Wang, C., Sekine, S., Vargas, J.N.S., Zhang, Z., Youle, A.M.,  
325 Nezich, C.L., Wu, X., Hammer, J.A., Youle, R.J., 2017. Mitochondrial fission facilitates  
326 the selective mitophagy of protein aggregates. *J Cell Biol* 216, 3231–3247.  
327 <https://doi.org/10.1083/jcb.201612106>
- 328 Carter, N.J., Cross, R.A., 2005. Mechanics of the kinesin step. *Nature* 435, 308–312.  
329 <https://doi.org/10.1038/nature03528>
- 330 Chakrabarti, R., Ji, W.K., Stan, R. V, Sanz, J.D.J., Ryan, T.A., Higgs, H.N., 2018. INF2-  
331 mediated actin polymerization at the ER stimulates mitochondrial calcium uptake, inner  
332 membrane constriction, and division. *J. Cell Biol.* 217, 251–268.  
333 <https://doi.org/10.1083/jcb.201709111>
- 334 Cho, B., Cho, H.M., Jo, Y., Kim, H.D., Song, M., Moon, C., Kim, Hyongbum, Kim, K.,  
335 Sesaki, H., Rhyu, I.J., Kim, Hyun, Sun, W., 2017. Constriction of the mitochondrial  
336 inner compartment is a priming event for mitochondrial division. *Nat. Commun.* 8,  
337 15754. <https://doi.org/10.1038/ncomms15754>
- 338 Colom, A., Derivery, E., Soleimanpour, S., Tomba, C., Molin, M.D., Sakai, N., González-  
339 Gaitán, M., Matile, S., Roux, A., 2018. A fluorescent membrane tension probe. *Nat.*  
340 *Chem.* 1–22. <https://doi.org/10.1038/s41557-018-0127-3>
- 341 De Brabander, M.J., Van de Veire, R.M.L., Aerts, F.E.M., Borgers, M., Janssan, P.A.J., 1976.  
342 The Effects of Methyl [5-(2-Thienylcarbonyl)-1H-benzimidazol-2-yl]carbamate, (R

- 343 17934; NSC 238159), a New Synthetic Antitumoral Drug Interfering with Microtubules,  
344 on Mammalian Cells Cultured in Vitro. *Cancer Res.* 36, 905–916.
- 345 Derényi, I., Jülicher, F., Prost, J., 2002. Formation and Interaction of Membrane Tubes. *Phys.*  
346 *Rev. Lett.* 88, 4. <https://doi.org/10.1103/PhysRevLett.88.238101>
- 347 Evans, E., Yeung, A., 1994. Hidden dynamics in rapid changes of bilayer shape. *Chem. Phys.*  
348 *Lipids* 73, 39–56. [https://doi.org/10.1016/0009-3084\(94\)90173-2](https://doi.org/10.1016/0009-3084(94)90173-2)
- 349 Feng, Q., Kornmann, B., 2018. Mechanical forces on cellular organelles. *J. Cell Sci.* 131,  
350 *jcs218479*. <https://doi.org/10.1242/jcs.218479>
- 351 Fonseca, T.B., Sánchez-Guerrero, Á., Milosevic, I., Raimundo, N., 2019. Mitochondrial  
352 fission requires DRP1 but not dynamins. *Nature* 570, E34–E42.  
353 <https://doi.org/10.1038/s41586-019-1296-y>
- 354 Friedman, J.R., Lackner, L.L., West, M., DiBenedetto, J.R., Nunnari, J., Voeltz, G.K., 2011.  
355 ER tubules mark sites of mitochondrial division. *Science* (80-. ). 334, 358–362.  
356 <https://doi.org/10.1126/science.1207385>
- 357 Fröhlich, C., Grabiger, S., Schwefel, D., Faelber, K., Rosenbaum, E., Mears, J., Rocks, O.,  
358 Daumke, O., 2013. Structural insights into oligomerization and mitochondrial  
359 remodelling of dynamin 1-like protein. *EMBO J.* 32, 1280–1292.  
360 <https://doi.org/10.1038/emboj.2013.74>
- 361 Gandre-Babbe, S., van der Blik, A.M., 2008. The novel tail-anchored membrane protein Mff  
362 controls mitochondrial and peroxisomal fission in mammalian cells. *Mol. Biol. Cell* 19,  
363 2402–12. <https://doi.org/10.1091/mbc.E07-12-1287>
- 364 Gauthier, N.C., Fardin, M.A., Roca-Cusachs, P., Sheetz, M.P., 2011. Temporary increase in  
365 plasma membrane tension coordinates the activation of exocytosis and contraction  
366 during cell spreading. *Proc. Natl. Acad. Sci. U. S. A.* 108, 14467–14472.  
367 <https://doi.org/10.1073/pnas.1105845108>

- 368 Giuseppe Cardillo, 2015. mwwtest(x1,x2) - File Exchange - MATLAB Central [WWW  
369 Document]. URL [https://ch.mathworks.com/matlabcentral/fileexchange/25830-](https://ch.mathworks.com/matlabcentral/fileexchange/25830-mwwtest-x1-x2)  
370 [mwwtest-x1-x2-](https://ch.mathworks.com/matlabcentral/fileexchange/25830-mwwtest-x1-x2) (accessed 12.12.17).
- 371 Gomes, L.C., Benedetto, G. Di, Scorrano, L., 2011. During autophagy mitochondria elongate,  
372 are spared from degradation and sustain cell viability. *Nat. Cell Biol.* 13, 589–598.  
373 <https://doi.org/10.1038/ncb2220>
- 374 Gonzalez-Rodriguez, D., Sart, S., Babataheri, A., Taresté, D., Barakat, A.I., Clanet, C.,  
375 Husson, J., 2015. Elastocapillary Instability in Mitochondrial Fission. *Phys. Rev. Lett.*  
376 115. <https://doi.org/10.1103/PhysRevLett.115.088102>
- 377 Goujon, A., Colom, A., Straková, K., Mercier, V., Mahecic, D., Manley, S., Sakai, N., Roux,  
378 A., Matile, S., 2019. Mechanosensitive Fluorescent Probes to Image Membrane Tension  
379 in Mitochondria, Endoplasmic Reticulum, and Lysosomes. *J. Am. Chem. Soc.* 141,  
380 3380–3384. <https://doi.org/10.1021/jacs.8b13189>
- 381 Gustafsson, M.G.L., 2000. Surpassing the lateral resolution limit by a factor of two using  
382 structured illumination microscopy. *J. Microsc.* 198, 82–87.  
383 <https://doi.org/10.1046/j.1365-2818.2000.00710.x>
- 384 Gustafsson, M.G.L., Shao, L., Carlton, P.M., Wang, C.J.R., Golubovskaya, I.N., Cande,  
385 W.Z., Agard, D.A., Sedat, J.W., 2008. Three-Dimensional Resolution Doubling in  
386 Wide-Field Fluorescence Microscopy by Structured Illumination. *Biophys. J.* 94, 4957–  
387 4970. <https://doi.org/10.1529/biophysj.107.120345>
- 388 Hatch, A.L., Gurel, P.S., Higgs, H.N., 2014. Novel roles for actin in mitochondrial fission. *J.*  
389 *Cell Sci.* 127, 4549–4560. <https://doi.org/10.1242/jcs.153791>
- 390 Helfrich, W., 1973. Elastic Properties of Lipid Bilayers: Theory and Possible Experiments.  
391 *Zeitschrift für Naturforsch. - Sect. C J. Biosci.* 28, 693–703. [https://doi.org/10.1515/znc-](https://doi.org/10.1515/znc-1973-11-1209)  
392 [1973-11-1209](https://doi.org/10.1515/znc-1973-11-1209)

- 393 Helle, S.C.J., Feng, Q., Aebersold, M.J., Hirt, L., Grüter, R.R., Vahid, A., Sirianni, A.,  
394 Mostowy, S., Snedeker, J.G., Šarić, A., Idema, T., Zambelli, T., Kornmann, B., 2017.  
395 Mechanical force induces mitochondrial fission. *Elife* 6, e30292.  
396 <https://doi.org/10.7554/eLife.30292>
- 397 Hoebeke, J., Van Nijen, G., De Brabander, M., 1976. Interaction of oncodazole (R 17934), a  
398 new anti-tumoral drug, with rat brain tubulin. *Biochem. Biophys. Res. Commun.* 69,  
399 319–324. [https://doi.org/10.1016/0006-291X\(76\)90524-6](https://doi.org/10.1016/0006-291X(76)90524-6)
- 400 Huang, X., Sun, L., Ji, S., Zhao, T., Zhang, W., Xu, J., Zhang, J., Wang, Y., Wang, X.,  
401 Franzini-Armstrong, C., Zheng, M., Cheng, H., 2013. Kissing and nanotunneling  
402 mediate intermitochondrial communication in the heart. *Proc Natl Acad Sci U S A* 110,  
403 2846–2851. <https://doi.org/10.1073/pnas.1300741110>
- 404 Ingeman, E., Perkins, E.M., Marino, M., Mears, J.A., McCaffery, J.M., Hinshaw, J.E.,  
405 Nunnari, J., 2005. Dnm1 forms spirals that are structurally tailored to fit mitochondria. *J.*  
406 *Cell Biol.* 170, 1021–1027. <https://doi.org/10.1083/jcb.200506078>
- 407 Ji, W.K., Hatch, A.L., Merrill, R.A., Strack, S., Higgs, H.N., 2015. Actin filaments target the  
408 oligomeric maturation of the dynamin GTPase Drp1 to mitochondrial fission sites. *Elife*  
409 4. <https://doi.org/10.7554/eLife.11553>
- 410 Kalia, R., Wang, R.Y.R., Yusuf, A., Thomas, P. V., Agard, D.A., Shaw, J.M., Frost, A.,  
411 2018. Structural basis of mitochondrial receptor binding and constriction by DRP1.  
412 *Nature* 558, 401–405. <https://doi.org/10.1038/s41586-018-0211-2>
- 413 Kamerkar, S.C., Kraus, F., Sharpe, A.J., Pucadyil, T.J., Ryan, M.T., 2018. Dynamin-related  
414 protein 1 has membrane constricting and severing abilities sufficient for mitochondrial  
415 and peroxisomal fission. *Nat. Commun.* 9, 5239. [https://doi.org/10.1038/s41467-018-](https://doi.org/10.1038/s41467-018-07543-w)  
416 [07543-w](https://doi.org/10.1038/s41467-018-07543-w)
- 417 Keren, K., Pincus, Z., Allen, G.M., Barnhart, E.L., Marriott, G., Mogilner, A., Theriot, J.A.,

- 418 2008. Mechanism of shape determination in motile cells. *Nature* 453, 475–480.
- 419 <https://doi.org/10.1038/nature06952>
- 420 Klecker, T., Scholz, D., Fortsch, J., Westermann, B., 2013. The yeast cell cortical protein
- 421 Num1 integrates mitochondrial dynamics into cellular architecture. *J. Cell Sci.* 126,
- 422 2924–2930. <https://doi.org/10.1242/jcs.126045>
- 423 Korobova, F., Ramabhadran, V., Higgs, H.N., 2013. An Actin-Dependent Step in
- 424 Mitochondrial Fission Mediated by the ER-Associated Formin INF2. *Science* (80-. ).
- 425 339, 464–467. <https://doi.org/10.1126/science.1228360>
- 426 Kozlov, M.M., Mogilner, A., 2007. Model of polarization and bistability of cell fragments.
- 427 *Biophys. J.* 93, 3811–3819. <https://doi.org/10.1529/biophysj.107.110411>
- 428 Kozlovsky, Y., Kozlov, M.M., 2003. Membrane Fission: Model for Intermediate Structures.
- 429 *Biophys. J.* 85, 85–96. [https://doi.org/10.1016/S0006-3495\(03\)74457-9](https://doi.org/10.1016/S0006-3495(03)74457-9)
- 430 Labrousse, A.M., Zappaterra, M.D., Rube, D.A., Van der Bliek, A.M., 1999. *C. elegans*
- 431 dynamin-related protein DRP-1 controls severing of the mitochondrial outer membrane.
- 432 *Mol. Cell* 4, 815–826. [https://doi.org/10.1016/S1097-2765\(00\)80391-3](https://doi.org/10.1016/S1097-2765(00)80391-3)
- 433 Lafaurie-Janvore, J., Maiuri, P., Wang, I., Pinot, M., Manneville, J.-B., Betz, T., Balland, M.,
- 434 Piel, M., 2013. ESCRT-III Assembly and Cytokinetic Abscission Are Induced by
- 435 Tension Release in the Intercellular Bridge. *Science* (80-. ). 339, 1625–1629.
- 436 <https://doi.org/10.1126/science.1233866>
- 437 Lee, J.E., Westrate, L.M., Wu, H., Page, C., Voeltz, G.K., 2016. Multiple dynamin family
- 438 members collaborate to drive mitochondrial division. *Nature* 540, 139–143.
- 439 <https://doi.org/10.1038/nature20555>
- 440 Legesse-Miller, A., Massol, R.H., Kirchhausen, T., 2003. Constriction and Dnm1p
- 441 Recruitment Are Distinct Processes in Mitochondrial Fission. *Mol. Biol. Cell* 14, 1953–
- 442 1963. <https://doi.org/10.1091/mbc.E02-10-0657>

- 443 Lewis, S.C., Uchiyama, L.F., Nunnari, J., 2016. ER-mitochondria contacts couple mtDNA  
444 synthesis with Mitochondrial division in human cells. *Science* (80-. ). 353, aaf5549.  
445 <https://doi.org/10.1126/science.aaf5549>
- 446 Lucy, L.B., 1974. An iterative technique for the rectification of observed distributions.  
447 *Astron. J.* 79, 745. <https://doi.org/10.1086/111605>
- 448 Manor, U., Bartholomew, S., Golani, G., Christenson, E., Kozlov, M., Higgs, H., Spudich, J.,  
449 Lippincott-Schwartz, J., 2015. A mitochondria-anchored isoform of the actin-nucleating  
450 spire protein regulates mitochondrial division. *Elife* 4.  
451 <https://doi.org/10.7554/eLife.08828>
- 452 Mears, J.A., Lackner, L.L., Fang, S., Ingeman, E., Nunnari, J., Hinshaw, J.E., 2011.  
453 Conformational changes in Dnm1 support a contractile mechanism for mitochondrial  
454 fission. *Nat. Struct. Mol. Biol.* 18, 20–26. <https://doi.org/10.1038/nsmb.1949>
- 455 Mitra, K., Wunder, C., Roysam, B., Lin, G., Lippincott-Schwartz, J., 2009. A hyperfused  
456 mitochondrial state achieved at G1-S regulates cyclin E buildup and entry into S phase.  
457 *Proc. Natl. Acad. Sci. U. S. A.* 106, 11960–5. <https://doi.org/10.1073/pnas.0904875106>
- 458 Morlot, S., Galli, V., Klein, M., Chiaruttini, N., Manzi, J., Humbert, F., Dinis, L., Lenz, M.,  
459 Cappello, G., Roux, A., 2012. Membrane shape at the edge of the dynamin helix sets  
460 location and duration of the fission reaction. *Cell* 151, 619–629.  
461 <https://doi.org/10.1016/j.cell.2012.09.017>
- 462 Mozdy, A.D., McCaffery, J.M., Shaw, J.M., 2000. Dnm1p GTPase-mediated mitochondrial  
463 fission is a multi-step process requiring the novel integral membrane component Fis1p.  
464 *J. Cell Biol.* 151, 367–379. <https://doi.org/10.1083/jcb.151.2.367>
- 465 Nunnari, J., Marshall, W.F., Straight, a, Murray, a, Sedat, J.W., Walter, P., 1997.  
466 Mitochondrial transmission during mating in *Saccharomyces cerevisiae* is determined by  
467 mitochondrial fusion and fission and the intramitochondrial segregation of

468 mitochondrial DNA. *Mol. Biol. Cell* 8, 1233–1242. <https://doi.org/10.1091/mbc.E12-03->  
469 0182

470 Otera, H., Wang, C., Cleland, M.M., Setoguchi, K., Yokota, S., Youle, R.J., Mihara, K.,  
471 2010. Mff is an essential factor for mitochondrial recruitment of Drp1 during  
472 mitochondrial fission in mammalian cells. *J. Cell Biol.*  
473 <https://doi.org/10.1083/jcb.201007152>

474 Palmer, C.S., Osellame, L.D., Laine, D., Koutsopoulos, O.S., Frazier, A.E., Ryan, M.T.,  
475 2011. MiD49 and MiD51, new components of the mitochondrial fission machinery.  
476 *EMBO Rep.* <https://doi.org/10.1038/embor.2011.54>

477 Rambold, A.S., Kostecky, B., Elia, N., Lippincott-Schwartz, J., 2011. Tubular network  
478 formation protects mitochondria from autophagosomal degradation during nutrient  
479 starvation. *Proc. Natl. Acad. Sci.* 108, 10190–10195.  
480 <https://doi.org/10.1073/pnas.1107402108>

481 Raucher, D., Sheetz, M.P., 2000. Cell spreading and lamellipodial extension rate is regulated  
482 by membrane tension. *J. Cell Biol.* 148, 127–136. <https://doi.org/10.1083/jcb.148.1.127>

483 Richardson, W.H., 1972. Bayesian-Based Iterative Method of Image Restoration\*. *J. Opt.*  
484 *Soc. Am.* 62, 55. <https://doi.org/10.1364/JOSA.62.000055>

485 Riggi, M., Bourgoing, C., Macchione, M., Matile, S., Loewith, R., Roux, A., 2019. TORC2  
486 controls endocytosis through plasma membrane tension. *J. Cell Biol.* 218, 2265–2276.  
487 <https://doi.org/10.1083/jcb.201901096>

488 Roux, A., Uyhazi, K., Frost, A., De Camilli, P., 2006. GTP-dependent twisting of dynamin  
489 implicates constriction and tension in membrane fission. *Nature* 441, 528–531.  
490 <https://doi.org/10.1038/nature04718>

491 Shim, S.-H., Xia, C., Zhong, G., Babcock, H.P., Vaughan, J.C., Huang, B., Wang, X., Xu, C.,  
492 Bi, G.-Q., Zhuang, X., 2012. Super-resolution fluorescence imaging of organelles in live

493 cells with photoswitchable membrane probes. *Proc. Natl. Acad. Sci.* 109, 13978–13983.  
494 <https://doi.org/10.1073/pnas.1201882109>

495 Smirnova, E., Griparic, L., Shurland, D.-L., Blik, A.M. van der, 2001. Dynamin-related  
496 Protein Drp1 Is Required for Mitochondrial Division in Mammalian Cells. *Mol. Biol.*  
497 *Cell* 12, 2245–2256. <https://doi.org/10.1091/mbc.12.8.2245>

498 Soleimanpour, S., Colom, A., Derivery, E., Gonzalez-Gaitan, M., Roux, A., Sakai, N.,  
499 Matile, S., 2016. Headgroup engineering in mechanosensitive membrane probes. *Chem.*  
500 *Commun.* 52, 14450–14453. <https://doi.org/10.1039/c6cc08771j>

501 Stepanyants, N., Macdonald, P.J., Francy, C.A., Mears, J.A., Qi, X., Ramachandran, R.,  
502 2015. Cardiolipin’s propensity for phase transition and its reorganization by dynamin-  
503 related protein 1 form a basis for mitochondrial membrane fission. *Mol. Biol. Cell* 26,  
504 3104–3116. <https://doi.org/10.1091/mbc.e15-06-0330>

505 Tondera, D., Grandemange, S., Jourdain, A., Karbowski, M., Mattenberger, Y., Herzig, S.,  
506 Da Cruz, S., Clerc, P., Raschke, I., Merkwirth, C., Ehses, S., Krause, F., Chan, D.C.,  
507 Alexander, C., Bauer, C., Youle, R., Langer, T., Martinou, J.-C., 2009. SLP-2 is required  
508 for stress-induced mitochondrial hyperfusion. *EMBO J.* 28, 1589–1600.  
509 <https://doi.org/10.1038/emboj.2009.89>

510 Twig, G., Elorza, A., Molina, A.J.A., Mohamed, H., Wikstrom, J.D., Walzer, G., Stiles, L.,  
511 Haigh, S.E., Katz, S., Las, G., Alroy, J., Wu, M., Py, B.F., Yuan, J., Deeney, J.T.,  
512 Corkey, B.E., Shirihai, O.S., 2008. Fission and selective fusion govern mitochondrial  
513 segregation and elimination by autophagy. *EMBO J.* 27, 433–446.  
514 <https://doi.org/10.1038/sj.emboj.7601963>

515 Ugarte-Urbe, B., Müller, H.M., Otsuki, M., Nickel, W., García-Sáez, A.J., 2014. Dynamin-  
516 related protein 1 (Drp1) promotes structural intermediates of membrane division. *J. Biol.*  
517 *Chem.* 289, 30645–30656. <https://doi.org/10.1074/jbc.M114.575779>



518 Wang, C., Du, W., Su, Q.P., Zhu, M., Feng, P., Li, Y., Zhou, Y., Mi, N., Zhu, Y., Jiang, D.,  
519 Zhang, S., Zhang, Z., Sun, Y., Yu, L., 2015. Dynamic tubulation of mitochondria drives  
520 mitochondrial network formation. *Cell Res.* 25, 1108–1120.  
521 <https://doi.org/10.1038/cr.2015.89>

522 Wolter, S., Löschberger, A., Holm, T., Aufmkolk, S., Dabauvalle, M.C., Van De Linde, S.,  
523 Sauer, M., 2012. RapidSTORM: Accurate, fast open-source software for localization  
524 microscopy. *Nat. Methods.* <https://doi.org/10.1038/nmeth.2224>

525 York, A.G., Chandris, P., Nogare, D.D., Head, J., Wawrzusin, P., Fischer, R.S., Chitnis, A.,  
526 Shroff, H., 2013. Instant super-resolution imaging in live cells and embryos via analog  
527 image processing. *Nat. Methods* 10, 1122–1126. <https://doi.org/10.1038/nmeth.2687>

528 Youle, R.J., van der Bliek, A.M., 2012. Mitochondrial Fission, Fusion, and Stress. *Science*  
529 (80-. ). 337, 1062–1065. <https://doi.org/10.1126/science.1219855>

530  
531  
532  
533

534

## 535 **Materials and Methods**

### 536 *Cell culture, transfections and dye labelling.*

537 Cos-7 cells were grown in Dulbecco's modified Eagle medium (DMEM) supplemented with

538 10% fetal bovine serum (FBS). Cells were plated on 25 mm, #1.5 glass coverslips (Menzel)

539 16-24 h prior to transfection at a confluency of  $\sim 10^5$  cells per well. Dual transfections

540 containing mCh-Drp1 (Addgene, plasmid #49152) and Mito-GFP (gift from Hari Shroff,

541 Cox8a presequence) were performed with either Lipofectamine 2000 (Life Technologies) or

542 using electroporation (BioRad Xcell). Lipofectamine transfections were carried out in Opti-

543 MEM using 150 ng of mCh-Drp1, 150 ng of Mito-GFP and 1.5  $\mu$ L of Lipofectamine 2000

544 per 100  $\mu$ L Opti-MEM. Electroporation was performed using salmon sperm as a delivery

545 agent. Briefly, cells were pelleted by centrifugation and resuspended in OPTI-MEM.

546 Plasmids and sheared salmon sperm DNA were added to 200  $\mu$ L of the cell suspension prior

547 to electroporation using a Bio-Rad Gene Pulser (190  $\Omega$  and 950  $\mu$ FD).

548 Triple transfections containing mCh-Drp1, Mito-BFP (Addgene, plasmid #49151) and Dyn2-

549 GFP (gift from Gia Voeltz) were performed with Lipofectamine 2000. Such transfections

550 were carried out in using 80 ng of mCh-Drp1, 100 ng of Dyn2-GFP and 80 ng of Mito-BFP

551 and 1.5  $\mu$ L of Lipofectamine 2000. Dual color imaging of dynamin was performed using

552 double transfections of either 100 ng Dyn2-GFP and 150 ng Mito-Scarlet, or 100 ng Dyn2-

553 mCherry and 150 ng Mito-GFP. Triple transfection containing Mito-BFP, Drp1-GFP and

554 KDEL-RFP were performed with Lipofectamine 2000. Such transfections were performed

555 using 100 ng Mito-BFP, 100 ng Drp1-GFP and 100 ng KDEL-RFP. All quantities listed are

556 per well of cells containing 2 mL of culture medium and carried out with Opti-MEM. The

557 Lipofectamine mixture sat for 20 min before its addition to cells.

558

559 ***Drug treatment.***

560 Nocodazole was diluted to a stock solution of 10 mM in DMSO. To depolymerize  
561 microtubules, cells were incubated with 10 $\mu$ M Nocodazole (Sigma-Aldrich) for 1h before  
562 imaging (1  $\mu$ L Nocodazole per 1000  $\mu$ L medium). Control cells were incubated with the  
563 equivalent volume of DMSO for 1h before imaging (1  $\mu$ L DMSO per 1000  $\mu$ L medium).  
564

565 ***SIM imaging and reconstruction.***

566 Fast dual-color SIM imaging was performed at Janelia Farm with an inverted fluorescence  
567 microscope (AxioObserver; Zeiss) using an SLM (SXGA-3DM; Fourth Dimension Displays)  
568 to create the illumination pattern and liquid crystal cell (SWIFT; Meadowlark) to control the  
569 polarization. Fluorescence was collected through a 100X 1.49 NA oil immersion objective  
570 and imaged onto a digital CMOS camera (ORCA-Flash4.0 v2 C11440; Hamamatsu). Time-  
571 lapse images were acquired every 1 s for 3-5 min, with 50 ms exposure time. Fast dual color  
572 imaging of mitochondria and Drp1 was performed at 37°C with 5% CO<sub>2</sub>, in pre-warmed  
573 DMEM medium. Dual-color SIM imaging for Nocodazole and Dyn2 experiments was  
574 performed on an inverted fluorescence microscope (Eclipse Ti; Nikon) equipped with an  
575 electron charge coupled device camera (iXon3 897; Andor Technologies). Fluorescence was  
576 collected with through a 100x 1.49 NA oil immersion objective (CFI Apochromat TIRF  
577 100XC Oil; Nikon). Images were captured using NIS elements with SIM (Nikon) resulting in  
578 temporal resolution of 1 s for single-color and 6-8s for dual-color imaging, with 50 ms  
579 exposure time. Imaging was performed at 37°C in pre-warmed Leibovitz medium. See SI for  
580 details on iSIM imaging, image reconstruction and analysis.  
581 SIM images were reconstructed using a custom 2D linear SIM reconstruction software  
582 obtained at Janelia farm, as previously described (Gustafsson, 2000; Gustafsson et al., 2008).

583 Images were reconstructed using a generalized Weiner filter parameter value of 0.02-0.05  
584 with background levels of ~100.

585

### 586 ***iSIM imaging and reconstruction.***

587 For iSIM experiments, imaging was performed on a custom-built microscope setup as  
588 previously described (York et al., 2013). The microscope was equipped with a 1.49 NA oil  
589 immersion objective (APONXOTIRF; Olympus), with 488 nm and 561 nm excitation lasers  
590 and an sCMOS camera (Zyla 4.2; Andor). Images were captured at 0.1-0.3 s temporal  
591 resolution for both channels. All imaging was performed at 37°C in pre-warmed Leibovitz  
592 medium. Raw iSIM images were deconvolved using the Lucy-Richardson deconvolution  
593 algorithm (Lucy, 1974; Richardson, 1972) implemented in MATLAB, run for 40 iterations.

594

### 595 ***Confocal imaging.***

596 Confocal imaging was performed on an inverted microscope (DMI 6000; Leica) equipped  
597 with hybrid photon counting detectors (HyD; Leica). Fluorescence was collected through a  
598 63x 1.40 NA oil immersion objective (HC PL APO 63x/1.40 Oil CS2; Leica). Images were  
599 captured using the LAS X software (Leica). All imaging was performed at 37°C in pre-  
600 warmed Leibovitz medium.

601

### 602 ***STORM imaging and reconstruction.***

603 For STORM imaging, prior to staining, cells were washed with PBS (Sigma). Cells were  
604 incubated with MitoTracker Red CMXRos (Life Technologies) at a concentration of 500 nM  
605 for 5 minutes, before washing again with PBS.

606 For measuring mitochondrial membrane potential, cells were incubated with 100 nM TMRE  
607 (Abcam, ab113852) for 10 minutes before time-lapse measurements.

608 STORM imaging was performed at room temperature in a glucose-oxidase/catalase (Glox)  
609 oxygen removal buffer described in (Shim et al., 2012). Briefly, a 2% glucose solution is  
610 prepared in DMEM (Gibco). Glucose oxidase (0.5 mg/mL) and catalase (40 µg/mL) were  
611 added to the glucose solution and the pH was left to drop for 30-60 min. After this time, the  
612 pH was adjusted to 7 yielding a final solution with 6.7% HEPES. Imaging was performed on  
613 an inverted microscope (IX71; Olympus) equipped with a 100x NA 1.4 oil immersion  
614 objective (UPlanSAPO100X; Olympus) using an electron multiplying CCD camera (iXon+;  
615 Andor Technologies), with a resulting pixel size of 100nm. Laser intensities were between 1-  
616 5 kWcm<sup>-2</sup>.  
617 For STORM datasets, single molecules were localized using the RapidSTORM v3.3 software  
618 (Wolter et al., 2012). Local signal-to-noise detection with a threshold value of 50 was used.  
619 Peaks with a width between 70-300 nm and at least 200 photons were rendered for the final  
620 STORM image.

621

### 622 ***FliptR synthesis.***

623 The FliptR probe was synthesized following previously reported procedures (Colom et al.,  
624 2018). For mitochondrial targeting, compounds 2,3 and 5 were synthesized and purified  
625 according to procedures that will be reported elsewhere in another manuscript (Goujon et al.,  
626 2019) in due time (SFigure 7).

627 Compound 5 was synthesized and purified according to procedures described in (Goujon et  
628 al., 2019) (SFigure 7).

629 The probe can report on membrane tension as reported in reference (Colom et al., 2018).  
630 Spectroscopic characterizations, mechanosensitive behavior in LUVs and GUVs of various  
631 lipid composition, colocalization studies in mitochondria and response of fluorescence

632 lifetime to osmotic shocks (i.e. membrane tension changes) is reported in (Goujon et al.,  
633 2019).

634

635 ***FLIM imaging and analysis.***

636 For FLIM imaging with the mitochondria-targeted FliptR probe, cells were incubated with  
637 500 nM of the probe solution for 15 min, and washed before imaging. Imaging was  
638 performed using a Nikon Eclipse TI A1R microscope equipped with a time-correlated single-  
639 photon counting module from PicoQuant. A pulsed 485 nm laser (PicoQuant LDH-D-C-485)  
640 was used for excitation, operated at 20 MHz. The emission was collected through ha 600/50  
641 nm bandpass filter, on a gated PMA hybrid 40 detector and a PicoHarp 300 board  
642 (PicoQuant).

643 FLIM data was analyzed using the SymPhoTime 64 software (PicoQuant). The fluorescence  
644 decay data was fit to a double exponential model after deconvolution for the calculated  
645 impulse response function. The values reported in the main text are the average lifetime  
646 intensity.

647

648 ***Statistics.***

649 Statistics were performed using Matlab and OriginPro software. All datasets were tested for  
650 normal distribution using the D'Agostino-Pearson normality test (significance value of 0.05)  
651 (Antonio Trujillo-Ortiz, 2015). If the datasets passed the test, then statistical significance was  
652 determined using a two-tailed t-tests. If datasets failed the normality test, a nonparametric test  
653 was chosen to compare the significance of means between groups Mann-Whitney test for two  
654 samples (with one or two tailed distributions where appropriate) and Kruskal-Wallis ANOVA  
655 for multiple samples (Giuseppe Cardillo, 2015).  $P < 0.05$  were considered as significant and  
656 were marked by '\*';  $P < 0.01$  with '\*\*',  $P < 0.001$  by '\*\*\*' and  $P < 0.0001$  by '\*\*\*\*'.

657 Curve fitting was performed using the curve fitting toolbox in Matlab.
