# Supplementary material for: Mitochondrial membrane tension governs fission
Source: bioRxiv or medRxiv preprint supplement (doi:10.1101/255356), 2020-10-20

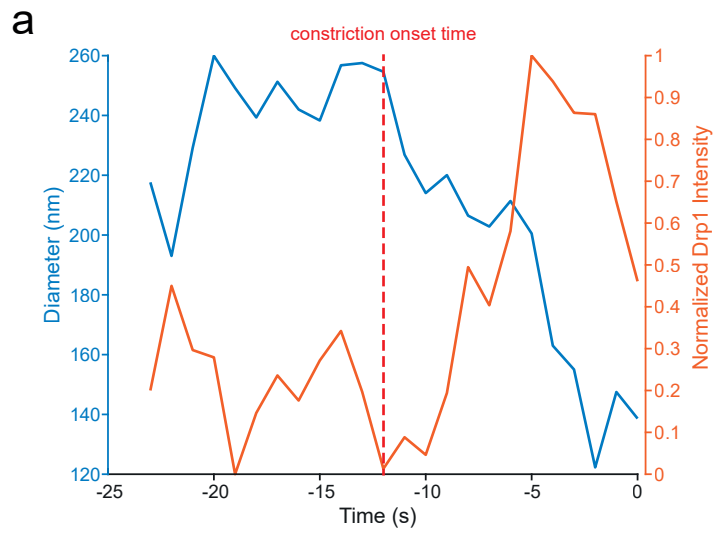

Supplement: Supplementary file [file 255356-7.pdf]
